# Supplementary material for: Variable Fitness Response of Two Rotifer Species Exposed to Microplastics Particles: The Role of Food Quantity and Quality
Source: MDPI journal article supplement (doi:10.3390/toxics9110305), 2021-11-13
Supplement: s1 [file s1]

# Supplementary Materials: Variable Fitness Response of Two Rotifer Species Exposed to Microplastics Particles: The Role of Food Quantity and Quality

Claudia Drago and Guntram Weithoff

**Table S1.** Concentration of food alga used for the experiments at saturating food concentration and limiting food concentration. The concentrations are expressed in cell/ml and correspond to 2 mgCL<sup>-1</sup>.

| Saturating food concentration (HF) (cell/ml) |                        |                    |
|----------------------------------------------|------------------------|--------------------|
| <i>B. calyciflorus</i> & <i>B. fernandoi</i> | <i>B. calyciflorus</i> |                    |
| <i>M. minutum</i>                            | <i>M. minutum</i>      | <i>Cryptomonas</i> |
| $2.07 \times 10^5$                           | $1.04 \times 10^5$     | $9.98 \times 10^3$ |
| Limiting food concentration (LF) (cell/ml)   |                        |                    |
| <i>B. calyciflorus</i> & <i>B. fernandoi</i> | <i>B. calyciflorus</i> |                    |
| <i>M. minutum</i>                            | <i>M. minutum</i>      | <i>Cryptomonas</i> |
| $5.18 \times 10^4$                           | $2.59 \times 10^4$     | $2.50 \times 10^3$ |

**Table S2.** Concentration of the microbeads used in the experiments. The concentrations are expressed as number of plastics per ml and correspond to 2 mg/L.

| Plastic (p/ml)     |                    |                    |                    | Silicate           |
|--------------------|--------------------|--------------------|--------------------|--------------------|
| PS                 |                    | PA                 |                    | SiO <sub>2</sub>   |
| 1 µm               | 3 µm               | 6 µm               | 5 µm - 25 µm       | 3µm                |
| $3.33 \times 10^6$ | $1.27 \times 10^5$ | $1.93 \times 10^4$ | $1.00 \times 10^3$ | $7.96 \times 10^4$ |

**Table S3.** Results from the pairwise comparisons (Emmeans test) relative to the egg ratio (Repr.t) of *B. calyciflorus* + one algal species, *B. fernandoi* + one algal species and *B. calyciflorus* + mix algal diet.

| <i>Brachionus calyciflorus</i> + <i>M. minutum</i> |           |        |         |                    |    |           |          |         |              |
|----------------------------------------------------|-----------|--------|---------|--------------------|----|-----------|----------|---------|--------------|
| food                                               | term      | .y.    | group1  | group2             | df | statistic | p        | p.adj   | p.adj.signif |
| HF                                                 | Treatment | Repr.t | control | nylon (PA)         | 44 | 0.72739   | 4.71E-01 | 1       | ns           |
| HF                                                 | Treatment | Repr.t | control | PS1                | 44 | 1.26585   | 2.12E-01 | 1       | ns           |
| HF                                                 | Treatment | Repr.t | control | PS3                | 44 | 3.8928    | 3.32E-04 | 0.00166 | **           |
| HF                                                 | Treatment | Repr.t | control | PS6                | 44 | 2.36431   | 2.25E-02 | 0.11271 | ns           |
| HF                                                 | Treatment | Repr.t | control | SiO <sub>2</sub> 3 | 44 | 1.71702   | 9.30E-02 | 0.46504 | ns           |
| LF                                                 | Treatment | Repr.t | control | nylon (PA)         | 44 | 2.42786   | 1.93E-02 | 0.09673 | ns           |
| LF                                                 | Treatment | Repr.t | control | PS1                | 44 | 3.95203   | 2.77E-04 | 0.00139 | **           |
| LF                                                 | Treatment | Repr.t | control | PS3                | 44 | 5.02562   | 8.86E-06 | 4.4E-05 | ****         |
| LF                                                 | Treatment | Repr.t | control | PS6                | 44 | 3.88952   | 3.36E-04 | 0.00168 | **           |
| LF                                                 | Treatment | Repr.t | control | SiO <sub>2</sub> 3 | 44 | 0.73044   | 4.69E-01 | 1       | ns           |
| <i>Brachionus fernandoi</i> + <i>M. minutum</i>    |           |        |         |                    |    |           |          |         |              |
| food                                               | term      | .y.    | group1  | group2             | df | statistic | p        | p.adj   | p.adj.signif |
| HF                                                 | Treatment | Repr.t | control | nylon (PA)         | 44 | 0.97434   | 3.35E-01 | 1       | ns           |
| HF                                                 | Treatment | Repr.t | control | PS1                | 44 | 3.26718   | 2.11E-03 | 0.01055 | *            |

|    |           |        |         |            |    |         |          |         |    |
|----|-----------|--------|---------|------------|----|---------|----------|---------|----|
| HF | Treatment | Repr.t | control | PS3        | 44 | 3.70227 | 5.92E-04 | 0.00296 | ** |
| HF | Treatment | Repr.t | control | PS6        | 44 | 2.51116 | 1.58E-02 | 0.0789  | ns |
| HF | Treatment | Repr.t | control | SiO2 3     | 44 | 1.13056 | 2.64E-01 | 1       | ns |
| LF | Treatment | Repr.t | control | nylon (PA) | 44 | 1.6058  | 1.15E-01 | 0.57736 | ns |
| LF | Treatment | Repr.t | control | PS1        | 44 | 1.92509 | 6.07E-02 | 0.30349 | ns |
| LF | Treatment | Repr.t | control | PS3        | 44 | 3.39709 | 1.45E-03 | 0.00727 | ** |
| LF | Treatment | Repr.t | control | PS6        | 44 | 3.7665  | 4.88E-04 | 0.00244 | ** |
| LF | Treatment | Repr.t | control | SiO2 3     | 44 | 1.25057 | 2.18E-01 | 1       | ns |

| <i>Brachionus calyciflorus</i> + Mix algal diet |           |        |         |            |    |           |          |         |              |
|-------------------------------------------------|-----------|--------|---------|------------|----|-----------|----------|---------|--------------|
| food                                            | term      | .y.    | group1  | group2     | df | statistic | p        | p.adj   | p.adj.signif |
| HF                                              | Treatment | Repr.t | control | nylon (PA) | 44 | -0.3798   | 7.06E-01 | 1       | ns           |
| HF                                              | Treatment | Repr.t | control | PS1        | 44 | -2.0795   | 4.34E-02 | 0.21715 | ns           |
| HF                                              | Treatment | Repr.t | control | PS3        | 44 | 3.44998   | 1.25E-03 | 0.00624 | **           |
| HF                                              | Treatment | Repr.t | control | PS6        | 44 | 1.83156   | 7.38E-02 | 0.36896 | ns           |
| HF                                              | Treatment | Repr.t | control | SiO2 3     | 44 | 1.61583   | 1.13E-01 | 0.56639 | ns           |
| LF                                              | Treatment | Repr.t | control | nylon (PA) | 44 | 0.14795   | 8.83E-01 | 1       | ns           |
| LF                                              | Treatment | Repr.t | control | PS1        | 44 | 1.2119    | 2.32E-01 | 1       | ns           |
| LF                                              | Treatment | Repr.t | control | PS3        | 44 | 2.33196   | 2.43E-02 | 0.12172 | ns           |
| LF                                              | Treatment | Repr.t | control | PS6        | 44 | 2.14551   | 3.75E-02 | 0.18735 | ns           |
| LF                                              | Treatment | Repr.t | control | SiO2 3     | 44 | 2.62153   | 1.20E-02 | 0.05988 | ns           |

The egg ratio was square root transformed and grouped by food against the reference group control.  $p$  values were adjusted with Bonferroni and significance is expressed as  $p < 0.05$ .

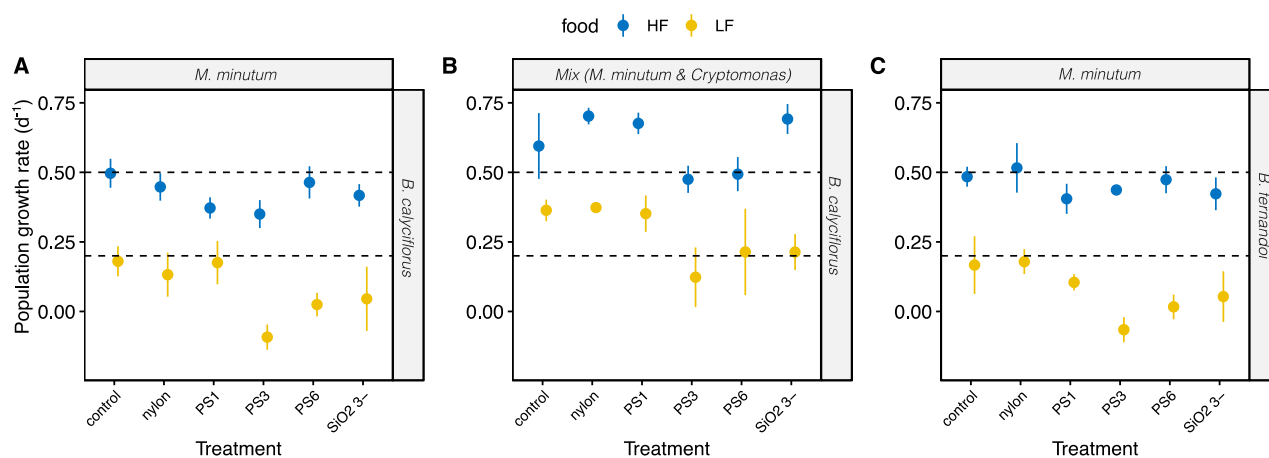

**Figure S1.** Population growth rate (mean ± SD) of *B. calyciflorus* (a) and *B. fernandoi* (c) with one algal species and mix algal diet for *B. calyciflorus* (b). Blue dots represent the population growth rate at saturating food concentration (HF) and the yellow dots are the population growth rate at limiting food concentration (LF).

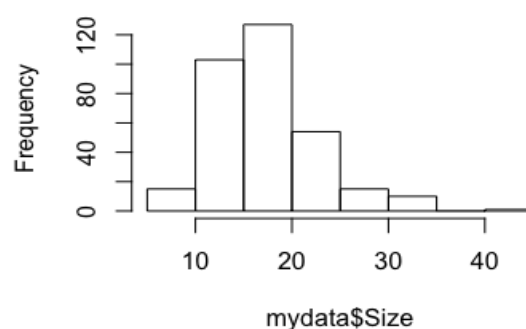

**Figure S2.** Size range distribution of the PA Nylon beads.

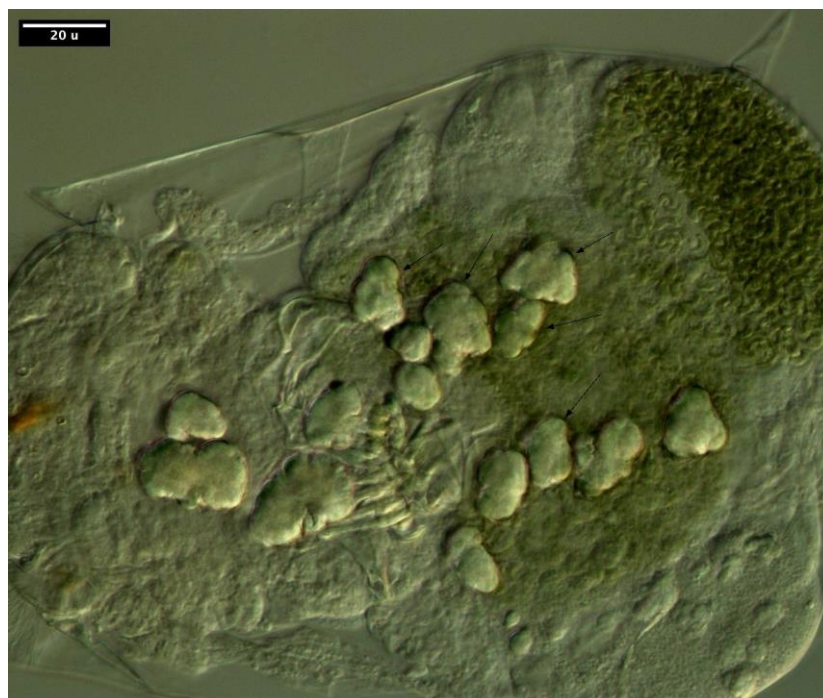

**Figure S3.** PA Nylon beads ingested by *B. calyciflorus*, the beads are indicated with the black arrows.

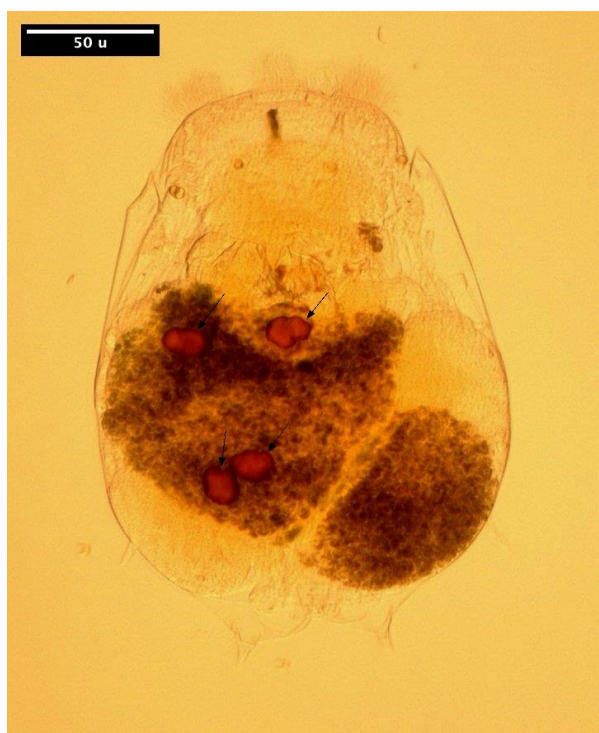

**Figure S4.** PA Nylon beads ingested by *B. calyciflorus* fixed with Lugol, the PA beads are indicated with the arrow.

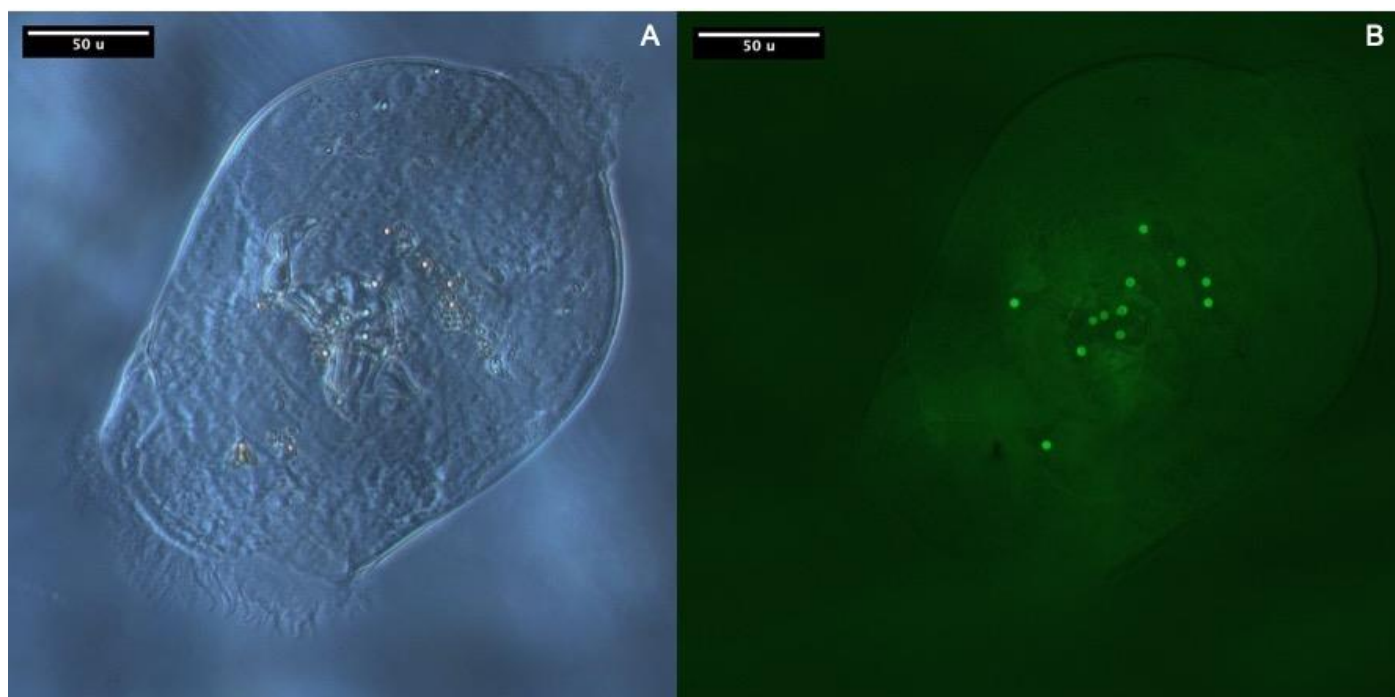

**Figure S5A–B.** PS beads (3µm) ingested by *B. calyciflorus* (A) in bright light and (B) fluorescent light.
